# Supplementary material for: Hydrogen bonding to oxygen in siloxane bonds drives liquid phase adsorption of primary alcohols in high-silica zeolites
Source: Royal Society of Chemistry journal article supplement (doi:10.1039/d3mh00888f), 2023-01-01
Supplement: d3mh00888f1.pdf [file d3mh00888f1.pdf]

# Methods, supplementary figures and tables

## Hydrogen Bonding to Oxygen in Siloxane Bonds Drives Liquid Phase Adsorption of Primary Alcohols in High-Silica Zeolites

Sambhu Radhakrishnan<sup>a,b</sup>, Charlotte Lejaegere<sup>b</sup>, Karel Duerinckx<sup>a,b</sup>, Wei-Shang Lo<sup>c</sup>, Alysson F. Morais<sup>a,b</sup>, Dirk Dom<sup>a,b</sup>, C. Vinod Chandran<sup>a,b</sup>, Ive Hermans<sup>c</sup>, Johan A. Martens<sup>a,b</sup> and Eric Breynaert<sup>\*a,b</sup>

### Contents

|                                                                                                      |    |
|------------------------------------------------------------------------------------------------------|----|
| 1. Methods .....                                                                                     | 1  |
| 1.1. Sample preparation .....                                                                        | 1  |
| 1.2. Characterization .....                                                                          | 2  |
| 1.2.1. Solid state NMR .....                                                                         | 2  |
| 1.2.2. Infrared spectroscopy .....                                                                   | 2  |
| 1.2.3. Adsorption isotherm .....                                                                     | 3  |
| 2. Supplementary figures and tables .....                                                            | 3  |
| 2.1. Synthesis compositions and obtained crystalline phases .....                                    | 3  |
| 2.2. NMR investigation of adsorption <i>in situ</i> in a rotor and peak assignments .....            | 8  |
| 2.3. Determination of maximum theoretical alcohol adsorption capacity in MFI zeolite framework ..... | 9  |
| 2.4. NMR spectral decomposition and mechanistic studies .....                                        | 10 |
| 2.5. NMR spectral decomposition and mechanistic studies .....                                        | 13 |
| 3. References .....                                                                                  | 14 |

## 1. Methods

### 1.1. Sample preparation

Five ZSM-5 (MFI framework type) zeolite samples in ammonium form were obtained from Zeolyst. Herein they are dubbed according to their Si/Al ratio (MFI-11.5 (CBV2314), MFI-15 (CBV3024), MFI-25 (CBV5524), MFI-40 (CBV8014) and MFI-140 (CBV28014)). Before use, the powders were converted to the acid form by calcination at 550 °C. Properties of interest are listed in Table 1. Nitrogen physisorption data was recorded on a Micromeritics instrument (Tristar Surface Area and Porosity Analyzer). The samples were pretreated by heating the powders to 400 °C (ramp of 5 °C/min) under N<sub>2</sub> atmosphere using the SmartPrep™ Programmable Degas System (Micromeritics). The concentration of Brønsted acid sites and defect sites was estimated using NMR spectroscopy (Table 2). The chemical shift ranges of <sup>1</sup>H NMR resonances used for integration of silanol, aluminol and bridging hydroxyl groups were 1 – 2.5, 2.5 – 3.5 and 3.5 - 7 ppm, respectively (Figures S1 and S2, Table S1 and S2).<sup>1</sup> The quantification may be slightly influenced by the presence of trace amounts of very strongly adsorbed water that could not be evacuated by dehydration treatment at 200 °C at 75 mTorr and also by chemical exchange effects<sup>2</sup> (Table 2 and Figure S1). Spectral

decomposition of  $^{27}\text{Al}$  direct excitation spectra using Cjzjek<sup>3</sup> line-shapes for quadrupoles in DMFIT software was used for identification and quantification of  $^{27}\text{Al}$  species in different coordination environments, namely tetra-, distorted tetra-, penta- and hexa-coordination (Table 1, Table S3 and Figure S3). The presence of significant amounts of extra-framework aluminum was observed, especially in the case of Al-rich zeolites (MFI-11.5, MFI-15), accounting for the higher concentrations of aluminols.

## 1.2. Characterization

### 1.2.1. Solid state NMR

$^1\text{H}$  direct excitation,  $^1\text{H}$ - $^{13}\text{C}$  CPMAS and  $^1\text{H}$ - $^{29}\text{Si}$  HETCOR spectra were acquired on a Bruker Avance III 500 MHz (11.7 T) spectrometer equipped with a 4 mm H/X/Y triple resonance solid-state magic angle spinning (MAS) probe. Adsorbent samples were packed into a 4 mm  $\text{ZrO}_2$  rotor and dried inside the rotor for 16 h at 200 °C under vacuum (75 mTorr). The dried adsorbents were subsequently loaded with alcohol, followed by capping the rotors with vespel snap-on caps and equilibrated for 4 h at 60 °C prior to the measurement.  $^1\text{H}$  direct excitation spectra were recorded in a quantitative way<sup>4</sup> with a  $\pi/2$  radio-frequency pulse (RF) at 83 kHz, averaging 8 transients with a recycle delay of 2 s.  $^1\text{H}$ - $^1\text{H}$  double-quantum–single-quantum (DQ–SQ) MAS correlation spectra were measured using the BABA<sup>5–7</sup> sequence with excitation and conversion periods of 0.13 ms. The two-dimensional spectra were collected with 80  $t_e$  increments of 66.67  $\mu\text{s}$  in the indirect dimension and 16 transients in the direct dimension.  $^1\text{H}$ - $^{13}\text{C}$  (125.95 MHz) cross-polarization (CP) MAS NMR experiments were recorded at a MAS rate of 15 kHz using a 83 kHz  $^1\text{H}$  excitation pulse, a 2500  $\mu\text{s}$  ramped pulse (100 % - 70 %),  $^1\text{H}$  contact pulse at 50 kHz and a square  $^{13}\text{C}$  contact pulse at 65 kHz, accumulating 2048 scans with a recycle delay of 2 s.  $^1\text{H}$ - $^{13}\text{C}$  CP-HETCOR experiment was performed at 15 kHz MAS using 64 scans and a contact time of 500  $\mu\text{s}$ , collecting 144 slices with 16.67  $\mu\text{s}$  increment. SPINAL-64<sup>8</sup> H-decoupling was performed during acquisition using 56 kHz RF pulses.  $^1\text{H}$  and  $^{13}\text{C}$  spectra were referenced using adamantane  $^1\text{H}$  and  $^{13}\text{C}$  (methylene) resonances at 1.81 ppm and 38.5 ppm respectively as a secondary reference to neat tetramethyl TMS (0 ppm). Direct excitation  $^{29}\text{Si}$  (99.50 MHz) MAS NMR was performed at a MAS rate of 15kHz, using 61 kHz RF excitation pulses, 256 transients with a recycle delay of 120 s and SPINAL-64  $^1\text{H}$ -decoupling at 56 kHz.  $^1\text{H}$ - $^{29}\text{Si}$  CP-HETCOR experiment was performed at 15 kHz MAS using 160 scans and a contact time of 1000  $\mu\text{s}$ , collecting 72 slices with 33.33  $\mu\text{s}$  increment.  $^1\text{H}$  contact pulse of 56 kHz (100 - 70 % ramped pulse) and a square 70 kHz RF on Si was used. SPINAL-64  $^1\text{H}$  decoupling with 56 kHz RF pulses were performed during acquisition.  $^{29}\text{Si}$  spectra were referenced against neat TMS using secondary reference  $\text{Q}_8\text{M}_8$  [ $\text{Si}(\text{CH}_3)_3$ ] $_{18}\text{Si}_8\text{O}_{20}$ ] resonance at 109.68 ppm, for the farthest downfield frequency peak.<sup>9</sup>  $^{27}\text{Al}$  direct excitation NMR spectra were acquired at 15 kHz MAS using 208 kHz RF pulse, recycle delay of 1 s and SPINAL64 decoupling at 56 kHz RF. 4096 transients were acquired for MFI-11.5, MFI-15, MFI-25, MFI-40, while 49,152 transients were acquired for MFI-140.  $^{27}\text{Al}$  spectra were referenced against a 1.1 M  $\text{Al}(\text{NO}_3)_3$  solution in  $\text{D}_2\text{O}$  at 0 ppm. Spectral decomposition was performed with DMFIT<sup>10</sup> software.

### 1.2.2. Infrared spectroscopy

IR spectra of 1-pentanol adsorption on zeolites were recorded by using a Bruker Vertex 70 spectrometer equipped with a liquid nitrogen-cooled Mercury-Cadmium-Telluride (MCT) detector. The measurements were performed by averaging 128 scans at 4  $\text{cm}^{-1}$  resolution between 800 and 4000  $\text{cm}^{-1}$ . Zeolite powders (~10 mg) were pressed into a self-supporting wafer and placed into a sample holder in a home-built transmission cell. The temperature of the sample was controlled by a PID controller (LOVE Controls 16B) with a type-K thermocouple directly contacted with the sample holder. Before the IR measurements, each sample was heated up to 30 °C under a dry air flow (40  $\text{cm}^3 \text{min}^{-1}$ , Drierite Gas Purifier) for 12 h. The IR cell was heated up to 500 °C (5 °C  $\text{min}^{-1}$ ) and held for 1 h under a dry air flow (40  $\text{cm}^3 \text{min}^{-1}$ ). After that, the cell was cooled down to 200 °C under dry air and evacuated ( $< 1 \times 10^{-4}$  Torr) by a turbo pump (Pfeiffer). A background FT-IR spectrum was collected at 30 °C under vacuum ( $< 1 \times 10^{-4}$  Torr). The zeolites were then exposed to increasing vapor pressures of 1-pentanol at 25 °C to promote adsorption. Different pentanol dosages were achieved by bubbling  $\text{N}_2$  through a bubbler (Aldrich, 4 mL) containing 1-pentanol and assuming saturation. For each 1-pentanol dosage, the IR spectrum was measured after the pressure in the cell remained constant for 3 min.

### 1.2.3. Adsorption isotherm

Liquid phase adsorption at high solid/liquid ratio. Determination of the saturation capacity of MFI-11.5 and MFI-140 for the different alcohols (methanol, ethanol, 1- propanol obtained from Acros Organic and 1-pentanol from Fluka Chemicals) and 1- pentanol adsorption on MFI-15, MFI-25 and MFI-40 was performed by addition of small aliquots of the alcohol to a rotor-packed zeolite dehydrated at 200°C under vacuum after packing in the NMR rotor. Adsorption of pure alcohol from the liquid phase onto MFI zeolite was investigated using *in situ* quantitative  $^1\text{H}$  direct excitation MAS NMR.<sup>4</sup>  $^1\text{H}$  direct excitation MAS NMR enables absolute quantification,<sup>4,11,12</sup> while at the same time allowing to discriminate between adsorbed and mobile fractions based on their relaxation behaviour. The combined information allows to quantify adsorption.

## 2. Supplementary figures and tables

### 2.1. Synthesis compositions and obtained crystalline phases

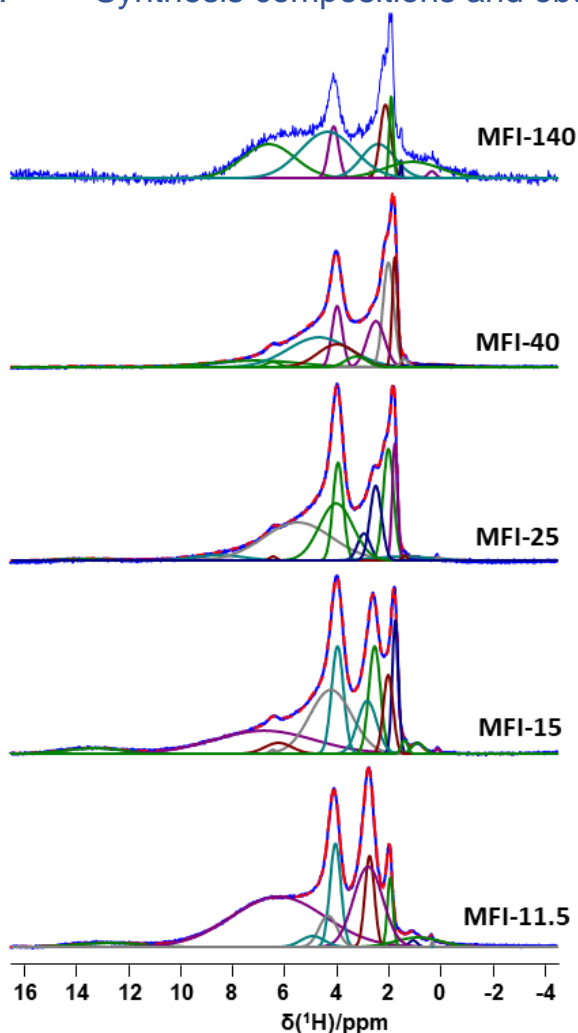

**Figure S1.** Spectral decomposition of  $^1\text{H}$  NMR spectra of all the dehydrated adsorbents. All the spectra are scaled to height.

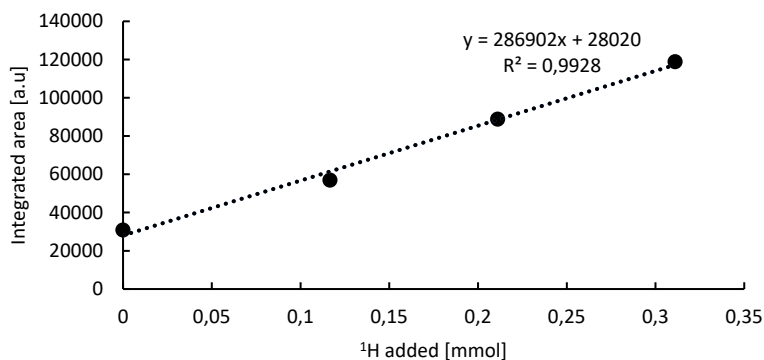

**Figure S2.** Integrated areas plotted against amount of  $^1\text{H}$  added [mmol/g]. The slope of the fit (286902) is the area/mmol  $^1\text{H}$ .

**Table S1. Determination of concentration of different  $^1\text{H}$  species (BAS/BAS+H<sub>2</sub>O, AlOH & SiOH) in the different adsorbents. The adsorbents were dehydrated under vacuum (0.75 Torr) at 200°C. The slope of the standard addition curve (286902) was used for the calculation**

| Adsorbent | Total integral per gram | Relative Integral (%)    |      |      | Concentration [mmol/g]   |      |      |
|-----------|-------------------------|--------------------------|------|------|--------------------------|------|------|
|           |                         | BAS/BAS+H <sub>2</sub> O | AlOH | SiOH | BAS/BAS+H <sub>2</sub> O | AlOH | SiOH |
| MFI-11.5  | 476257.3                | 60.2                     | 36.7 | 3.0  | 1                        | 0.61 | 0.05 |
| MFI-15    | 289771                  | 38.6                     | 13.3 | 9.0  | 0.64                     | 0.22 | 0.15 |
| MFI-25    | 240997.7                | 36.1                     | 2.4  | 12.0 | 0.6                      | 0.04 | 0.2  |
| MFI-40    | 172141.2                | 22.3                     | 4.8  | 9.0  | 0.37                     | 0.08 | 0.15 |
| MFI-140   | 34428.24                | 4.2                      | 0.6  | 2.4  | 0.07                     | 0.01 | 0.04 |

**Table S2. Experimental data of water standard addition to determine the integrated area/mmol  $^1\text{H}$ . Integrated areas and amount of water added in g and as mmol are represented. Q-values of the NMR probe head was measured using a HP RF Network Analyzer**

| Water added [mg] | $^1\text{H}$ added [mmol] | Area     | Q-values |
|------------------|---------------------------|----------|----------|
| 0.0              | 0.000                     | 30824.68 | 620.9    |
| 1.1              | 0.117                     | 56893.53 | 622.2    |
| 1.9              | 0.211                     | 88801.32 | 596.9    |
| 2.8              | 0.311                     | 118857.4 | 595.3    |

**Table S3. Si/Al ratio for the MFI zeolites used in this study. Column 1: data provided by the supplier; Column 2: values calculated from elemental analysis (ICP-OES) and Column 3: values reported in the PhD thesis of A. Janda (University of Berkeley) for the same materials.<sup>13</sup>**

| Zeolite         | Si/Al (Zeolyst) | Si/Al (ICP) | Si/Al (ICP) PhD Thesis A. Janda <sup>13</sup> |
|-----------------|-----------------|-------------|-----------------------------------------------|
| <b>MFI-11.5</b> | 11.5            | 12.5        | 12.1 ± 1.7                                    |
| <b>MFI-15</b>   | 15              | 17.8        | 16.5 ± 2.5                                    |
| <b>MFI-25</b>   | 25              | 32          | 28.8 ± 4.4                                    |
| <b>MFI-40</b>   | 40              | 50          | 43.7 ± 6.5                                    |
| <b>MFI-140</b>  | 140             | 152         | 142 ± 48                                      |

**Table S4. Determination of concentration of different <sup>27</sup>Al species via spectral decomposition in the different adsorbents.**

| Zeolite  | $\delta_{\text{iso}}(^{27}\text{Al})$ (ppm) | $C_Q$ (MHz) | dCS (ppm) | Relative integral (%) | Assignment      |
|----------|---------------------------------------------|-------------|-----------|-----------------------|-----------------|
| MFI-11.5 | 56.2                                        | 2.6         | 3.4       | 40                    | Tetra           |
|          | 52.9                                        | 1.1         | 3.7       | 4                     | Tetra           |
|          | 47.9                                        | 1.8         | 17.6      | 25                    | Distorted-Tetra |
|          | 30.1                                        | 2.0         | 20.4      | 12                    | Penta           |
|          | 0.3                                         | 1.6         | 4.8       | 4                     | Hexa            |
|          | -3.5                                        | 1.8         | 22.7      | 15                    | Hexa            |
|          | -5.6                                        | 1.4         | 2.9       | 1                     | Hexa            |
| MFI-15   | 56.3                                        | 2.5         | 2.7       | 45                    | Tetra           |
|          | 53.3                                        | 1.4         | 3.3       | 9                     | Tetra           |
|          | 47.6                                        | 1.9         | 15.6      | 20                    | Distorted-Tetra |
|          | 31.0                                        | 2.0         | 20.4      | 10                    | Penta           |
|          | 1.0                                         | 2.5         | 3.8       | 5                     | Hexa            |
|          | -4.8                                        | 2.3         | 23.8      | 11                    | Hexa            |
| MFI-25   | 57.1                                        | 2.2         | 2.8       | 53                    | Tetra           |
|          | 54.3                                        | 1.1         | 3.7       | 20                    | Tetra           |
|          | 49.6                                        | 2.7         | 22.4      | 20                    | Distorted-Tetra |
|          | 0.3                                         | 1.2         | 3.0       | 2                     | Hexa            |
|          | -3.4                                        | 1.7         | 15.7      | 5                     | Hexa            |
| MFI-40   | 60.4                                        | 1.5         | 18.6      | 3                     | Tetra           |
|          | 57.0                                        | 1.6         | 2.7       | 47                    | Tetra           |
|          | 54.2                                        | 1.0         | 3.4       | 35                    | Tetra           |
|          | 49.8                                        | 1.4         | 23.2      | 11                    | Distorted-Tetra |
|          | -0.3                                        | 0.5         | 1.4       | 1                     | Hexa            |
|          | -2.1                                        | 1.6         | 12.7      | 3                     | Hexa            |
| MFI-140  | 60.0                                        | 1.5         | 16.9      | 5                     | Tetra           |
|          | 57.0                                        | 1.5         | 2.9       | 45                    | Tetra           |
|          | 54.5                                        | 1.8         | 2.4       | 27                    | Tetra           |
|          | 49.8                                        | 1.5         | 27.9      | 18                    | Distorted-Tetra |
|          | -0.3                                        | 1.4         | 16.4      | 5                     | Hexa            |

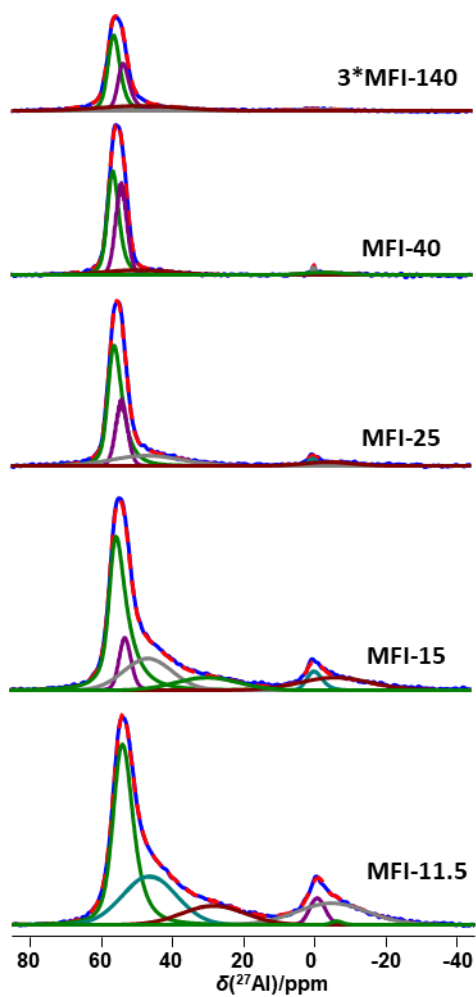

**Figure S3.** Spectral decomposition of  $^1\text{H}$  decoupled  $^{27}\text{Al}$  direct excitation NMR spectrum. Results depicted in Table 2.

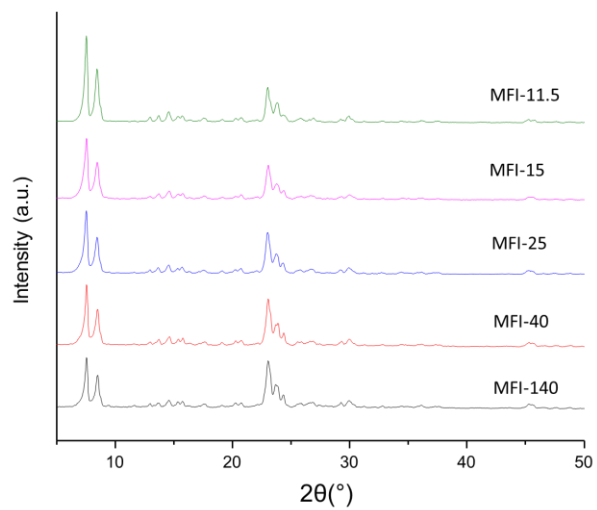

**Figure S4.** PXRD patterns of the different MFI zeolites,

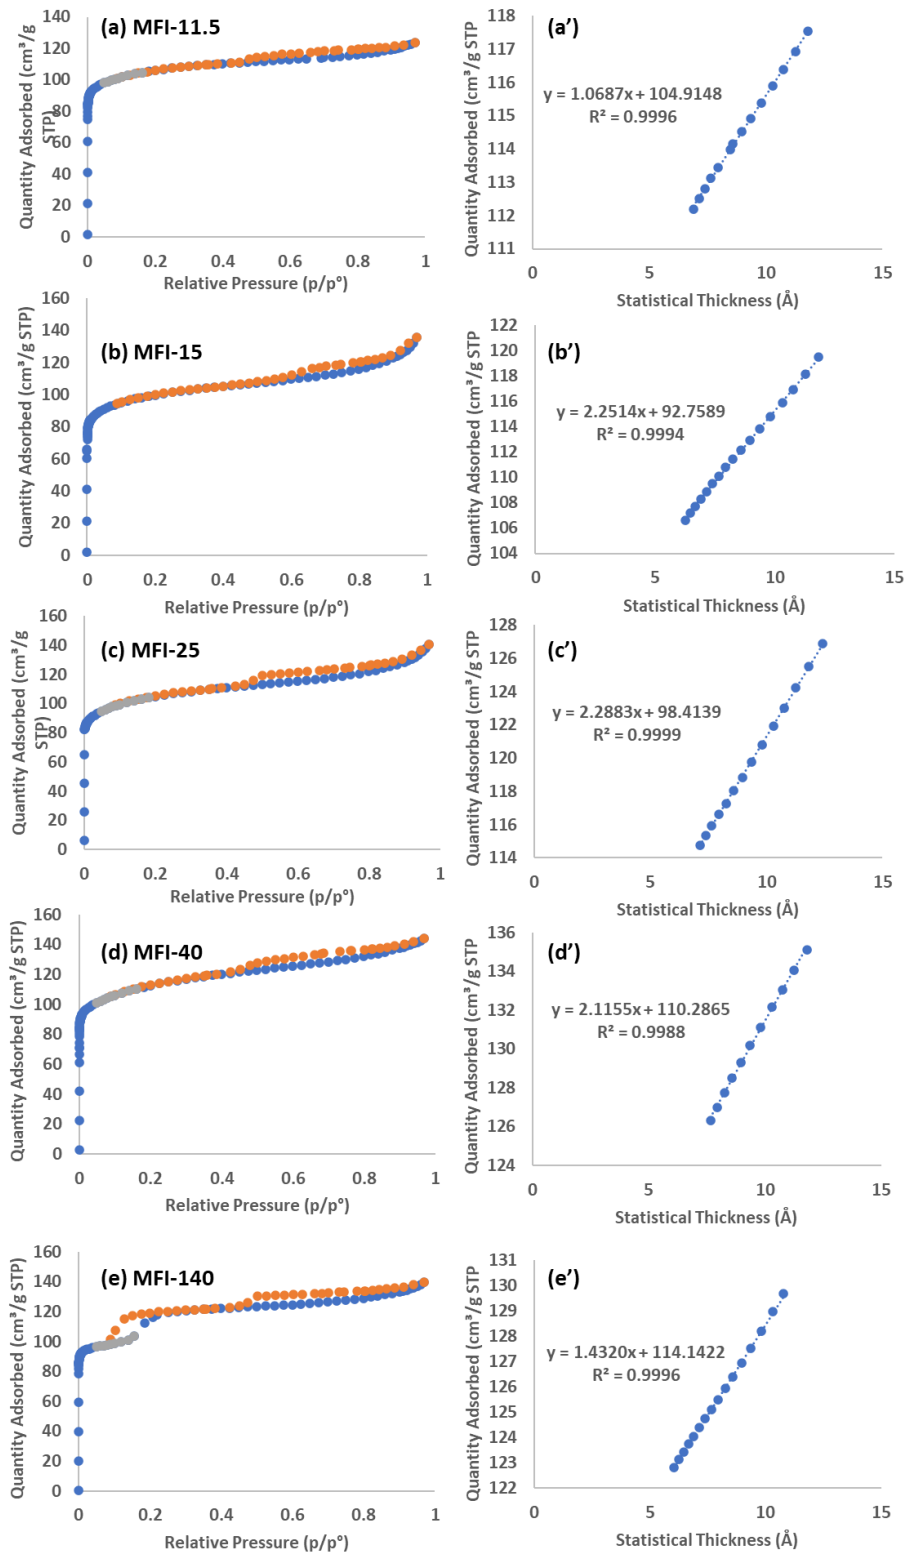

Figure S5.  $N_2$  physisorption isotherm and t-plot respectively for H-MFI-11.5 (a, a'), H-MFI-15 (b, b'), H-MFI-25 (c, c'), H-MFI-40 (d, d') and H-MFI-140 (e, e').

## 2.2 NMR investigation of adsorption *in situ* in a rotor and peak assignments

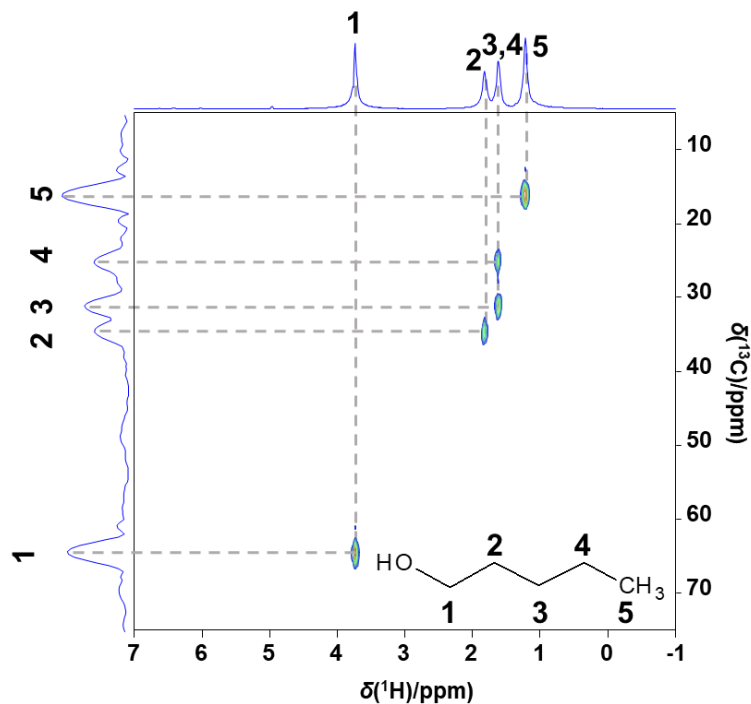

**Figure S6.**  $^1\text{H}$ - $^{13}\text{C}$  HMQC measurement of 1-pentanol liquid depicting the identification of different resonances

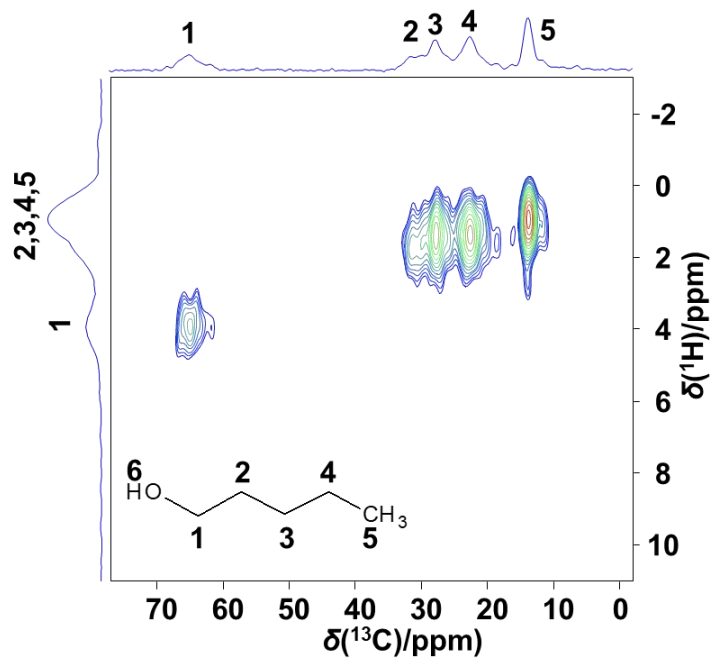

**Figure S7.**  $^1\text{H}$ - $^{13}\text{C}$  HETCOR spectrum of 1-pentanol adsorbed on MFI-11.5, confirming the assignments.



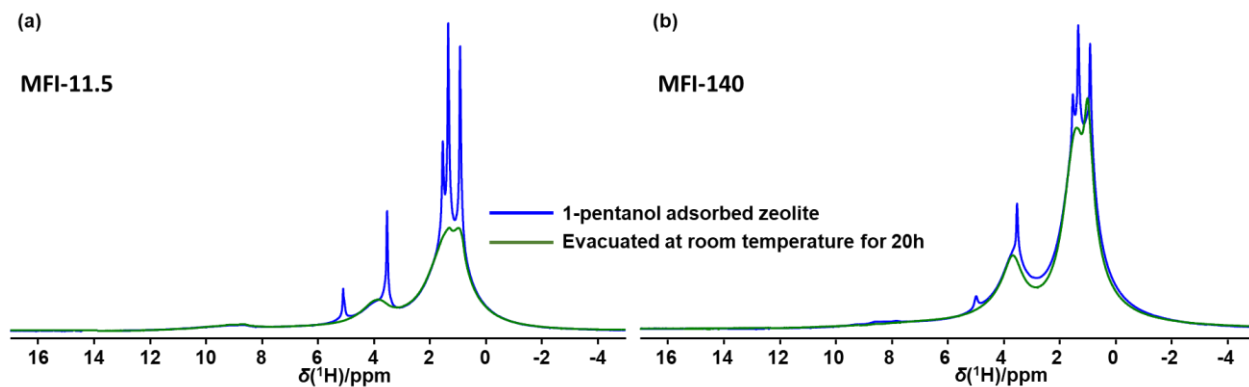

**Figure S8.**  $^1\text{H}$  NMR spectra of MFI-11.5 (a) and MFI-140 (b) upon addition of 1-pentanol higher than the micropore volume (blue trace) and after evacuation at 0.75 Torr for 20 h (green trace).

### 2.3 Determination of maximum theoretical alcohol adsorption capacity in MFI zeolite framework

Theoretical maximum alcohol adsorption capacity per unit cell calculated by considering the geometry of the two-channel type MFI framework (Table 3, Table S4 and Figure S7). One unit cell contains four linear segments of 4.5 Å length, four sinusoidal segments of 6.5 Å length and four intersections, all of cross section 5.5 Å.<sup>14</sup> The total channel length considered for adsorption was 18, 26.6 and 22.4 Å for the straight channels, the sinusoidal segments, and the intersections respectively. Adsorbed alcohol molecules were assumed to exhibit a critical diameter of ~4.6 Å and to orient along the pore axis.<sup>15</sup> As expected from a geometrical perspective, increasing chain length leads to a decrease in the maximum number of adsorbed molecules.

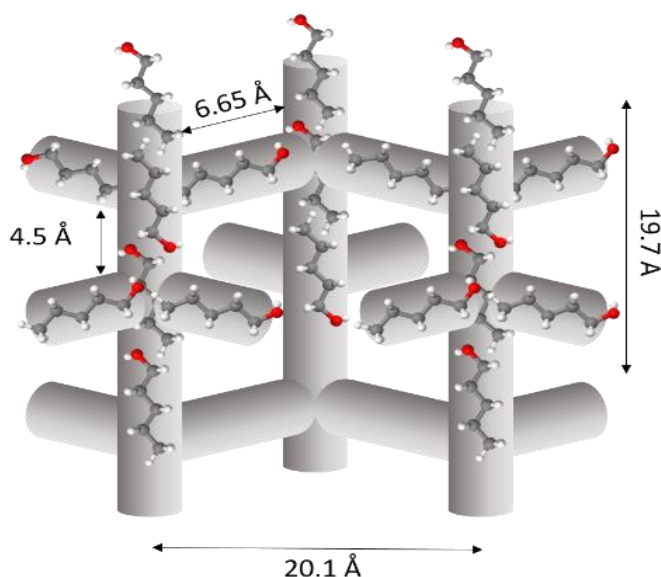

**Figure S9.** Visualization of the theoretical calculations of maximum pore filling of 1-pentanol in the MFI framework unit cell.<sup>4,8</sup>

**Table S5.** The molecule length and theoretical maximum adsorbed alcohol molecules per MFI unit cell<sup>16,17</sup>

| 1-Alcohol  | Molecule length [Å] | Theoretical maximum MFI [N/UC] |
|------------|---------------------|--------------------------------|
| Methanol   | 2.8                 | 23.9                           |
| Ethanol    | 4.03                | 16.5                           |
| 1-Propanol | 5.31                | 12.5                           |
| 1-Pentanol | 7.07                | 9.5                            |

**Table S6.** Variation of 1-pentanol adsorption capacity per BAS and per unit cell in the zeolite framework for MFI zeolites with different Si/Al ratios

| Zeolite  | Adsorbed per UC |              | Adsorbed amount (mmol/g) | Adsorbed per BAS | Adsorbed per BAS + Defect sites |
|----------|-----------------|--------------|--------------------------|------------------|---------------------------------|
|          | Theoretical     | Experimental |                          |                  |                                 |
| MFI-11.5 | 9.5             | 7.6          | 1.31                     | 1.2              | 0.8                             |
| MFI-15   | 9.5             | 8.7          | 1.48                     | 2.3              | 1.4                             |
| MFI-25   | 9.5             | 8.8          | 1.51                     | 2.5              | 1.8                             |
| MFI-40   | 9.5             | 9.5          | 1.62                     | 4.4              | 2.7                             |
| MFI-140  | 9.5             | 9.5          | 1.62                     | 23.2             | 13.5                            |

## 2.4 NMR spectral decomposition and mechanistic studies

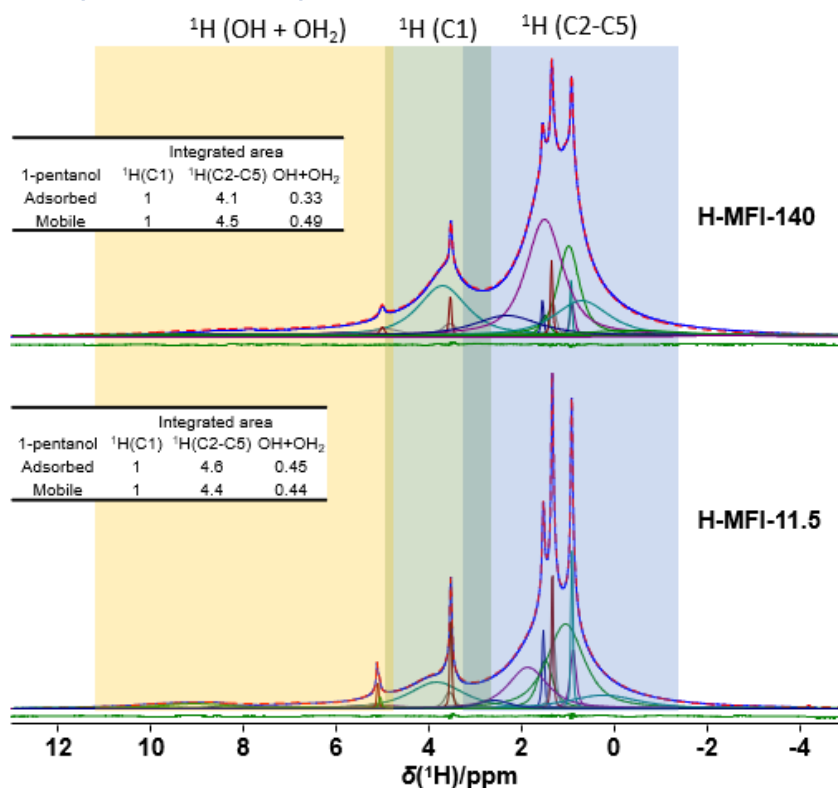

**Figure S10.** Spectral decomposition of <sup>1</sup>H direct excitation spectrum of 1-pentanol adsorbed H-MFI-140 and H-MFI-11.5 at 295K. Integrals relative to CH<sub>2</sub>-<sup>1</sup>H resonance is provided in the table.

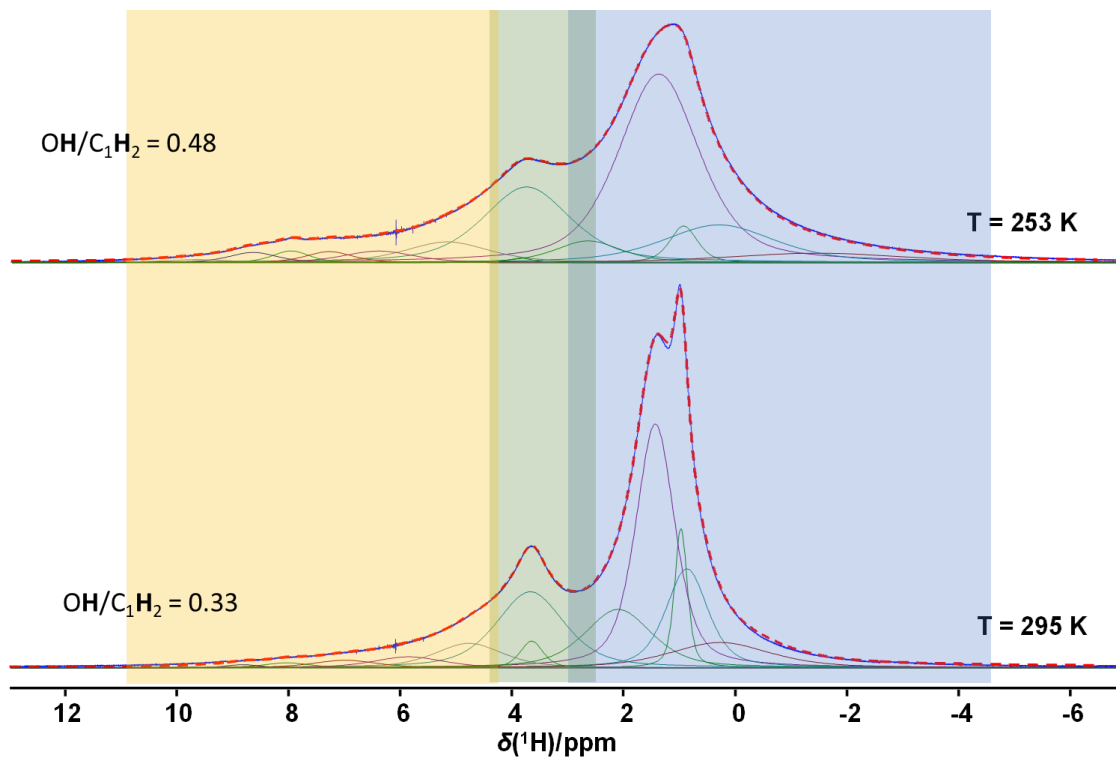

**Figure S11.** Spectral decomposition of <sup>1</sup>H direct excitation spectrum of 1-pentanol adsorbed H-MFI-140 at 295 K and 253 K. After adsorption exceeding the pore volume, the rotor with sample was subjected to vacuum treatment at room temperature to remove excess mobile molecules.

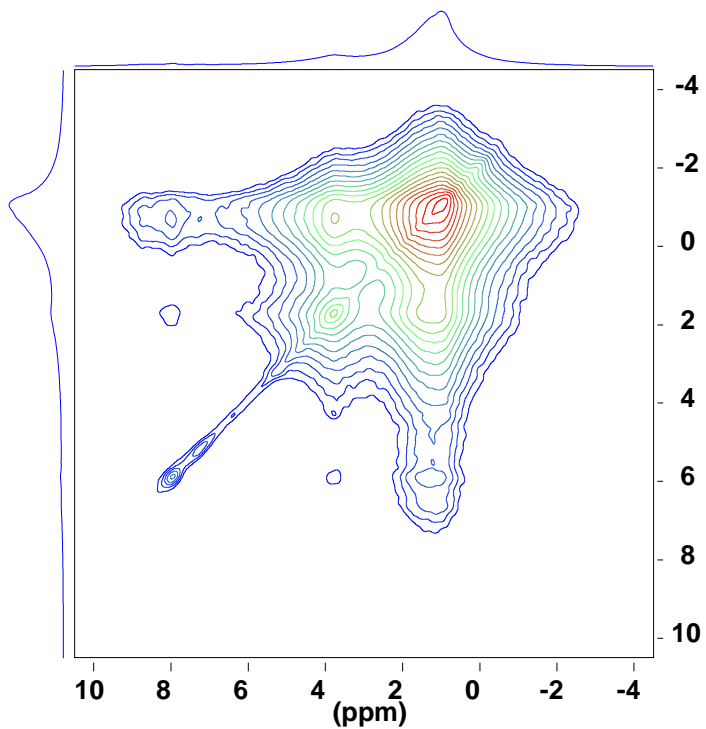

**Figure S12:** <sup>1</sup>H-<sup>1</sup>H RFDR spectrum of 1-pentanol adsorbed H-MFI-140.

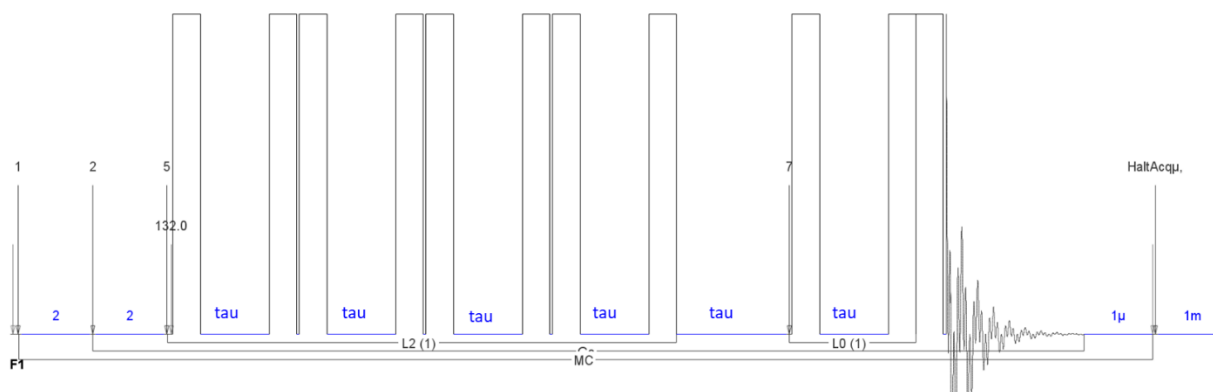

Figure S13. Pulse sequence (BABA) used for DQ-SQ experiments.

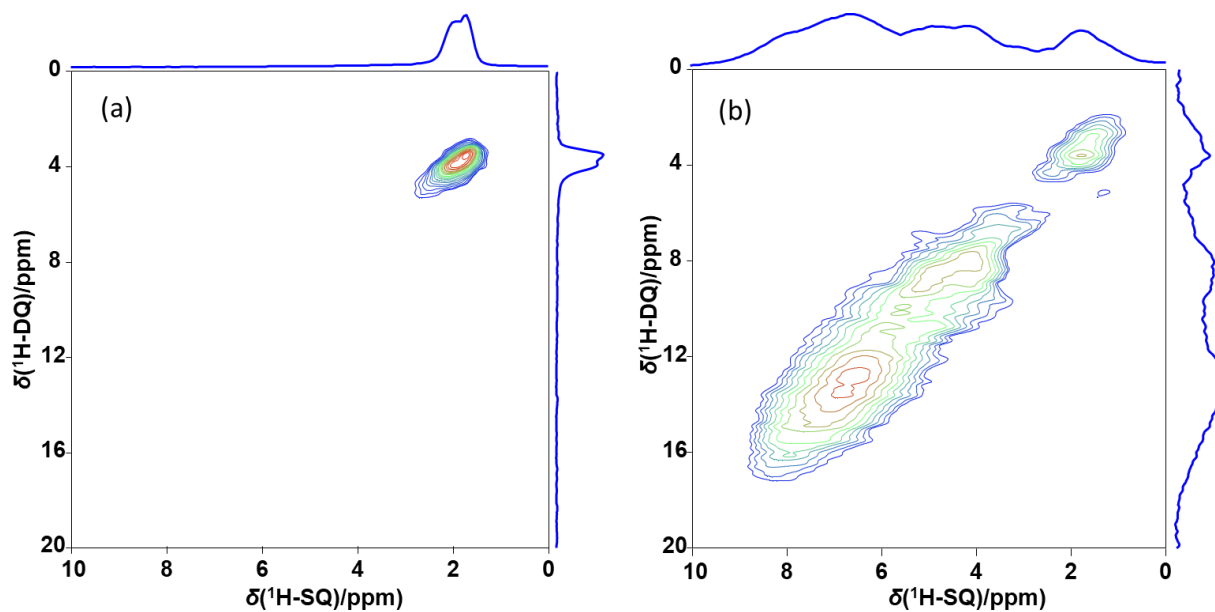

Figure S14.  $^1\text{H}$ - $^1\text{H}$  DQ-SQ spectrum of dehydrated H-MFI-140 (a) and H-MFI-140 with 10% pore-filling water. In the  $^1\text{H}$ - $^1\text{H}$  DQ-SQ spectra of the dry MFI-140 (Figure S14a), the self and cross correlations in and between the silanol nests immediately catch the eye of the reader (respectively at coordinates 1.8, 3.6 ppm and 2, 4 ppm). In the  $^1\text{H}$ - $^1\text{H}$  DQ-SQ spectra of the weakly hydrated (10% pore-filling) MFI-140 (Figure S14b), the self-correlations of silanol nests (1.8, 3.6 ppm), and multiple water populations [ (4, 8 ppm) & (6.5, 13 ppm) , most probably water hydrogen bonded to and in chemical exchange with silanol groups, as well as water hydrogen bonded to BAS / siloxane bridges respectively ] are indeed readily observed.

2.5 *In situ* FT-IR investigation of 1-pentanol adsorption on MFI-11.5 and MFI-140.

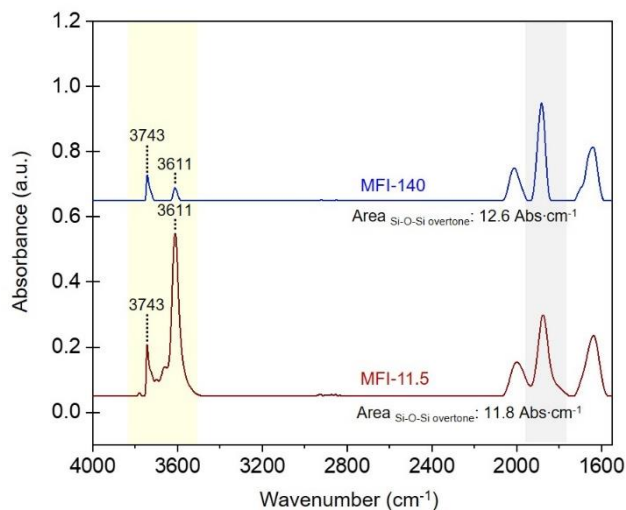

**Figure S15.** IR spectra of dehydrated MFI-140 and MFI-11.5 measured at 200 °C under dried air.

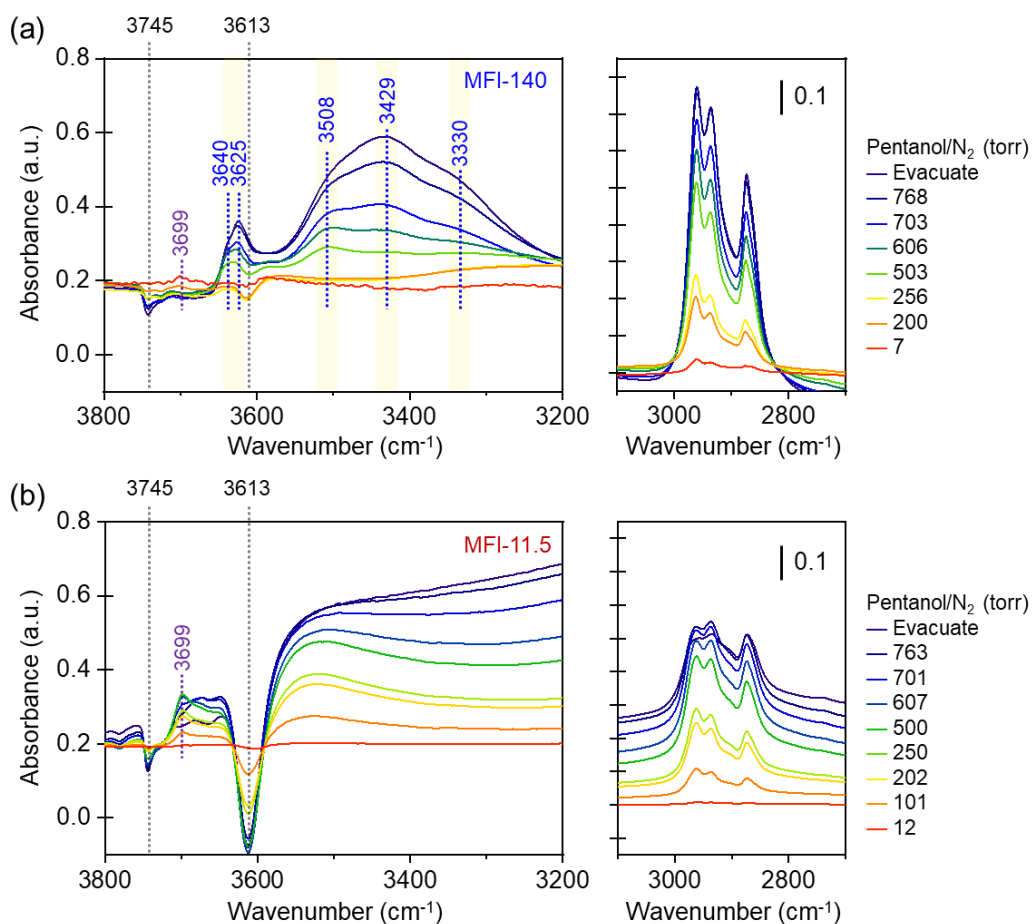

**Figure S16.** IR difference spectra of (a) MFI-140 and (b) MFI-11.5 with increasing dosage of 1-pentanol measured at 30 °C. The background spectrum was collected on the parent sample at 30 °C under vacuum.

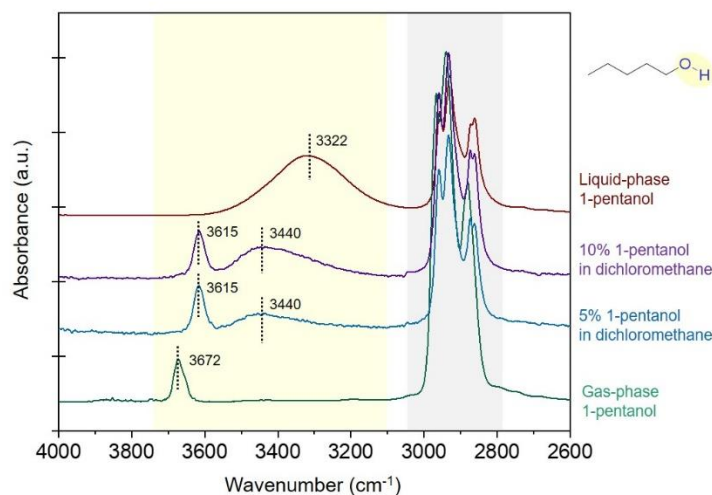

**Figure S17.** IR spectra of liquid-phase pentanol, gas-phase pentanol, and 1-pentanol dissolved in the nonpolar solvent of dichloromethane.

### 3. References

- 1 M. Hunger, *Catal. Rev. - Sci. Eng.*, 1997, **39**, 345–393.
- 2 M. Wang, N. R. Jaegers, M. S. Lee, C. Wan, J. Z. Hu, H. Shi, D. Mei, S. D. Burton, D. M. Camaioni, O. Y. Gutiérrez, V. A. Glezakou, R. Rousseau, Y. Wang and J. A. Lercher, *J. Am. Chem. Soc.*, 2019, **141**, 3444–3455.
- 3 J. B. d’Espinose de Lacaillerie, C. Fretigny and D. Massiot, *J. Magn. Reson.*, 2008, **192**, 244–251.
- 4 M. Houleberghs, A. Hoffmann, D. Dom, C. E. A. Kirschhock, F. Taulelle, J. A. Martens and E. Breynaert, *Anal. Chem.*, 2017, **89**, 6940–6943.
- 5 M. Feike, D. E. Demco, R. Graf, J. Gottwald, S. Hafner and H. W. Spiess, *J. Magn. Reson. Ser. A*, 1996, **122**, 214–221.
- 6 S. H. Park, S. Radhakrishnan, W. Choi, C. V. Chandran, K. C. Kemp, E. Breynaert, R. G. Bell, C. E. A. Kirschhock and S. B. Hong, *J. Am. Chem. Soc.*, 2022, **144**, 18054–18061.
- 7 B. Vallaey, S. Radhakrishnan, S. Heylen, C. V. Chandran, F. Taulelle, E. Breynaert and J. A. Martens, *Phys. Chem. Chem. Phys.*, DOI:10.1039/c8cp01586d.
- 8 T. Bräuniger, P. Wormald and P. Hodgkinson, *Monatshefte für Chemie*, 2002, **133**, 1549–1554.
- 9 C. R. Pesce, G. L. Bowen and R. J. Rocha, J., Sardo, M., Allen, G. C., Walker, P. J., Denault, G., Serrapede, M., and Ball, *Clay Miner.*, 2014, **49**, 341–358.
- 10 D. Massiot, F. Fayon, M. Capron, I. King, S. Le Calvé, B. Alonso, J.-O. Durand, B. Bujoli, Z. Gan and G. Hoatson, *Magn. Reson. Chem.*, 2002, **40**, 70–76.
- 11 S. Radhakrishnan, H. Colaux, C. V. Chandran, D. Dom, L. Verheyden, F. Taulelle, J. Martens and E. Breynaert, *Anal. Chem.*, 2020, **92**, 13004–13009.
- 12 H. Vanderschaege, M. Houleberghs, L. Verheyden, D. Dom, C. V. Chandran, S. Radhakrishnan, J. A. Martens and E. Breynaert, *Anal. Chem.*, 2022, **95**, 1880–1887.
- 13 A. L. Janda, University of California, Berkeley, 2015. <https://escholarship.org/uc/item/27g1z5ck>.
- 14 J. F. M. Denayer, K. De Meyer, J. A. Martens and G. V. Baron, *Angew. Chemie - Int. Ed.*, 2003, **42**, 2774–2777.

- 15 Z. Song, Y. Huang, W. L. Xu, L. Wang, Y. Bao, S. Li and M. Yu, *Sci. Rep.*, 2015, **5**, 13981.
- 16 E. García-Pérez, P. S. Barcia, J. A. C. Silva, A. E. Rodrigues and S. Calero, *Theor. Chem. Acc.*, 2011, **128**, 695–703.
- 17 H. Liu, Z. Zhang, B. H. Chen and Y. Zhao, *J. Porous Mater.*, 2008, **15**, 119–125.
